# Supplementary material
Source: PubMed Central journal article supplement (PMC4622697)

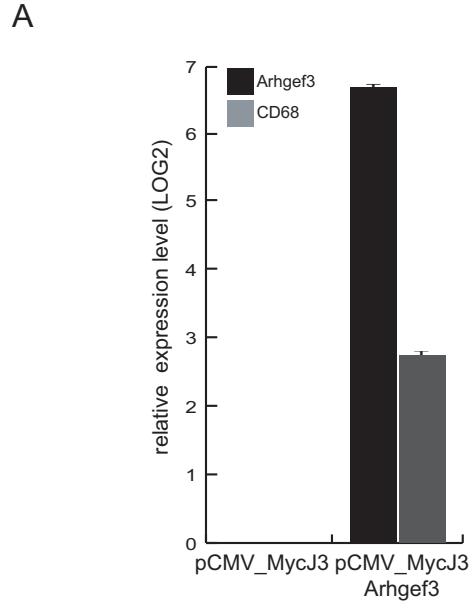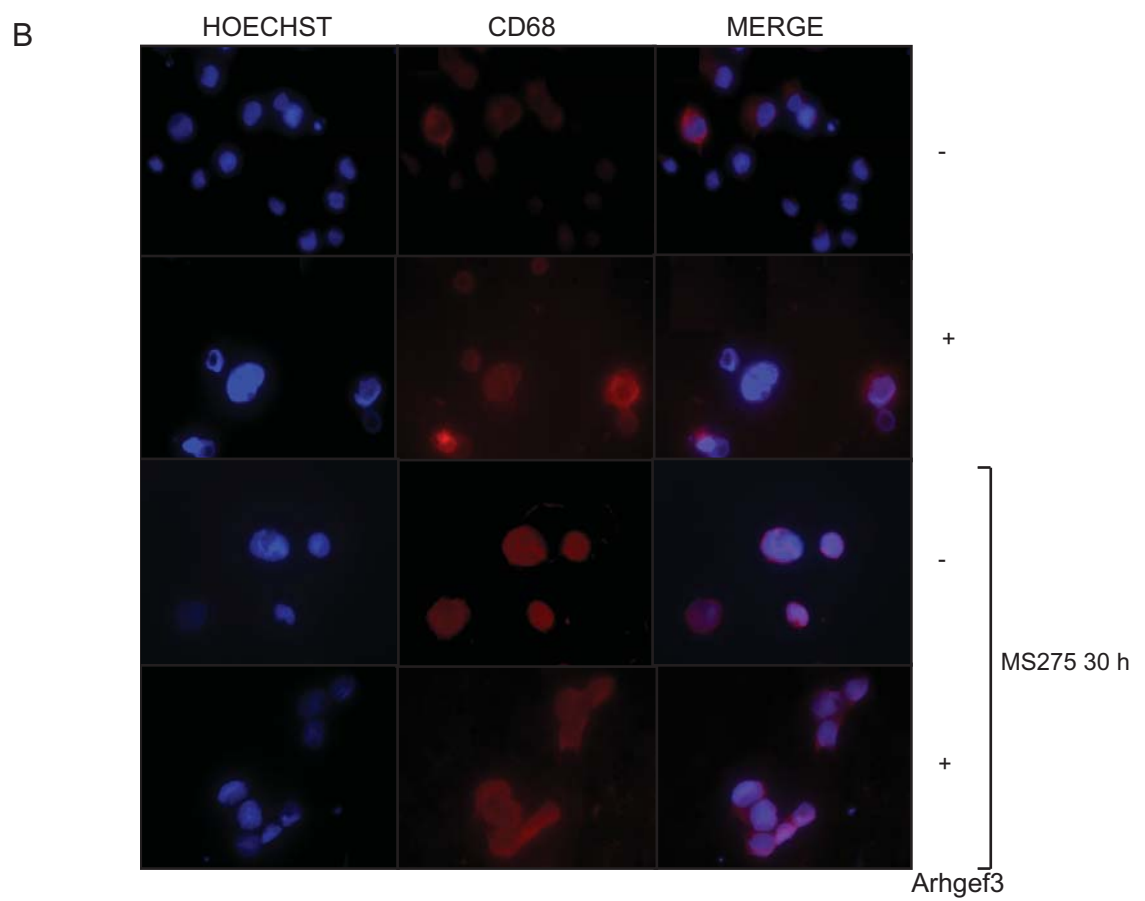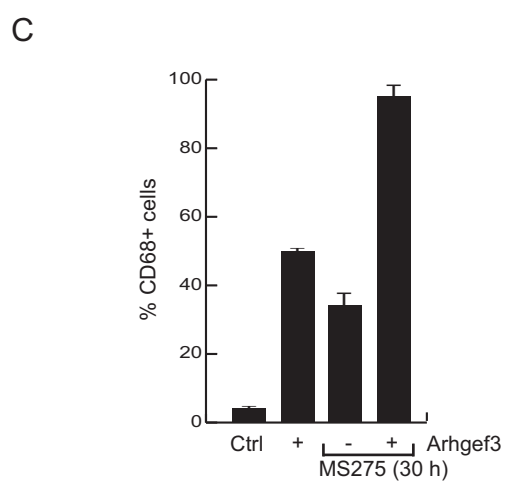

Supplement: kepi-10-01-988035-s002.pdf [file kepi-10-01-988035-s002.pdf]

A

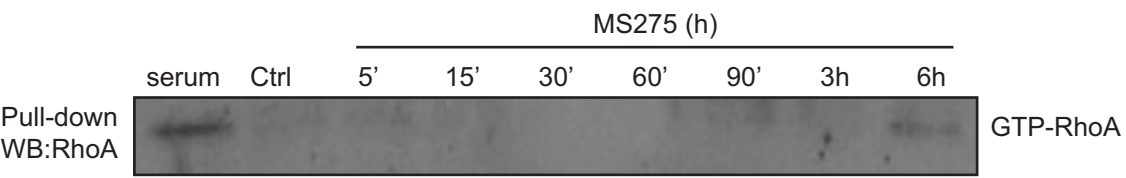

B

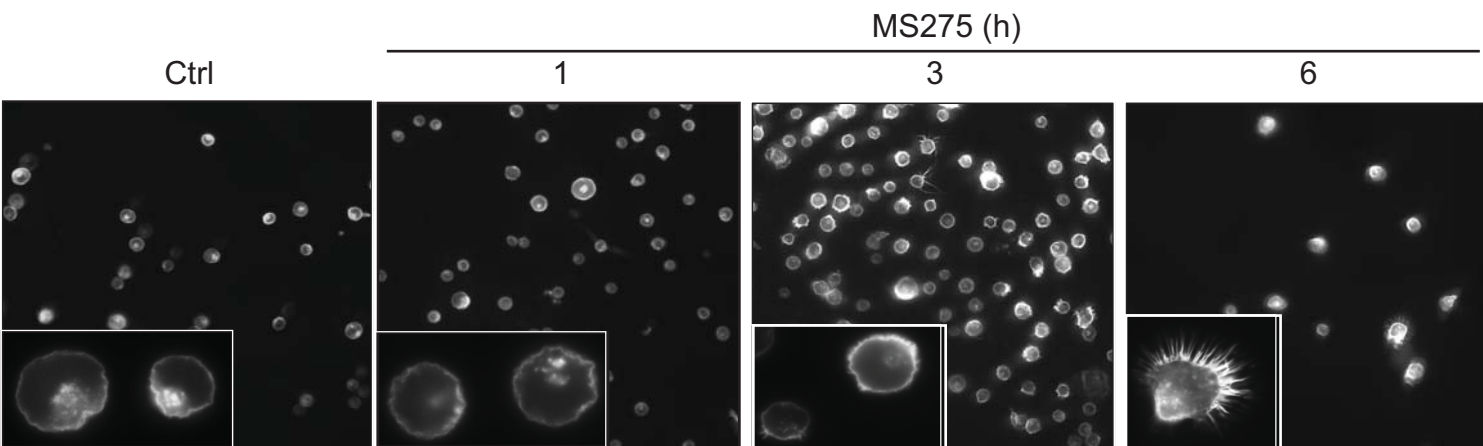

Supplement: kepi-10-01-988035-s003.pdf [file kepi-10-01-988035-s003.pdf]
